# Supplementary material for: Heparan Sulfate Organizes Neuronal Synapses through Neurexin Partnerships
Source: PubMed Central journal article supplement (PMC6173057; doi:10.1016/j.cell.2018.07.002), 2018-09-06
Supplement: mmc1.pdf [file mmc1.pdf]

**Cell, Volume 174**

## **Supplemental Information**

### **Heparan Sulfate Organizes Neuronal Synapses through Neurexin Partnerships**

**Peng Zhang, Hong Lu, Rui T. Peixoto, Mary K. Pines, Yuan Ge, Shinichiro Oku, Tabrez J. Siddiqui, Yicheng Xie, Wenlan Wu, Stephanie Archer-Hartmann, Keitaro Yoshida, Kenji F. Tanaka, A. Radu Aricescu, Parastoo Azadi, Michael D. Gordon, Bernardo L. Sabatini, Rachel O.L. Wong, and Ann Marie Craig**

**Table S1. The HS Modification Site on Nrxx is Evolutionary Conserved, Related to Figure 1**

(A) Evolutionary conservation in vertebrates.

| Nrxn | Species            | NCBI/Uniprot | Sequence Alignment                                   |
|------|--------------------|--------------|------------------------------------------------------|
| Nrx1 | Macaca mulatta     | XP_014967815 | TTTTLATSTARRGKPPT-KEPISQTTDDILVA SAACP-SD-DEDIDPCEPS |
| Nrx2 | Macaca mulatta     | XP_014969352 | TTTTMATTTTRGRSPTLRDSTTQNTDILLVA SAACP-SD-DEDLEECEPS  |
| Nrx3 | Macaca mulatta     | XP_005561989 | TTTTMATTTTRKNRSTAS----IQPTSDDLVS SAACS-SD-DEDFVECEP- |
| Nrx1 | Rattus norvegicus  | AAA41705     | TTTTLATSTARRGKPPT-KEPISQTTDDILVA SAACP-SD-DEDIDPCEPS |
| Nrx2 | Rattus norvegicus  | AAA41708     | TTTTMATTTTRGRSPTMRDSTTQNTDILLVA SAACP-SD-DEDLEECEPS  |
| Nrx3 | Rattus norvegicus  | AAA02857     | TTTTMATTTTRKNRSTAS----IQPTSDDLVS SAACS-SD-DEDFVECEP- |
| Nrx1 | Bos Taurus         | AAA19906     | TTTTLATSTARRGNSPT-KEPVSQTTDDILVA SAACP-SD-DEDIDPCEPS |
| Nrx2 | Bos Taurus         | XP_010819426 | TTTTMATTTTRGRSPTLRDSTTQNTDILLVA SAACP-SD-DEDLEECEPS  |
| Nrx3 | Bos Taurus         | AAA19908     | TTTTMATTTTRKNRSTAS----IQPTSDDLVS SAACS-SD-DEDFVECEPS |
| Nrx1 | Gallus gallus      | ACF35428     | TTTTLATSTARRGKAPT-KEPIGQTTDDILVA SAACP-SD-DEDIDPCEPS |
| Nrx3 | Gallus gallus      | ACF35430     | TTTTMATTTTRKNRSPPS----IQT-TDDIVS SAACS-SD-DEDFIDCEPS |
| Nrx1 | Xenopus tropicalis | XP_012819327 | TTTTLATST---RKSPT-REPVGQTTDDILVA SAACP-SDDDEDIDPCEPS |
| Nrx2 | Xenopus tropicalis | XP_004913566 | TTTTMATTTTRGRSPTMRDSITQNSDILLVA SAACP-SD-DEDLEECEPS  |
| Nrx3 | Xenopus tropicalis | XP_012824757 | TTTTLATTTTRKNRSSPG----STL-TDDIGS SAECFISDDEDVTDCT-   |
| Nrx1 | Danio rerio        | ABG25164     | TTSNTI---TIT---YSTPADEQQTDELLVA SAACP-SD-DEDIDPCEPS  |
| Nrx2 | Danio rerio        | ABG25168     | TTTTMATTTTRKQRSPTMRDSVTQNTDILLVA SAACP-SD-DEDLEECEPG |
| Nrx3 | Danio rerio        | ABG25174     | TTTTLSTTTTRKQRSPT----IQT-TDDIVS SAACS-SD-DEDEECDG-   |

The sequence surrounding the HS-modified serine (red highlight) is conserved in monkey, rat, bovine, chicken, frog, and zebrafish neurexins, as well as in human and mouse neurexins (Figure 1I). Alignment was performed with Clustal; \*, conserved residues.

(B) Potential HS modification in *Caenorhabditis elegans*.

|            |            |            |            |            |            |            |                    |
|------------|------------|------------|------------|------------|------------|------------|--------------------|
| VNVNGLMILD | LYENGSNRIH | TIGAPQTTAV | SEQVSSSEEE | DDELAEMMA  | HSIDENPNEA | LIESLAPSCL | SLEEQQSCFI         |
| DTDDSTGFFS | PVLPTVANFP | TTRQTEPETT | RRPLSPSKMT | PSLPSPTTTT | LPVFFLSQIT | DGDESEDEFD | <u>SG</u> GDDLFGGD |
| GVGITAATQP | SVKRTTSISV | VTKVLTTTSE | PSSTHRSTVL | PRPYASVKEA | AEQNPDYLGA | SIWNQVDTLP | EPMVTGPAWR         |
| TNKSLLTTAT | TEASSTKSNR | KTTTTTTTSA | TTTIRIQORP | NYDIDNEVTA | LITSSLAPQK | TRPKSTPHFT | VYVPRPTTPM         |
| GDITTTMQA  | ATVTDFFRTP | LIMCSSLAVI | IAIAAVVFFV |            |            |            |                    |

The sequence of *Caenorhabditis elegans* neurexin, Nrxx-1, between the LNS domain (cyan) and the transmembrane region (green) reveals a potential HS modification site (S, red highlight, flanked by underlined acidic residues).

**Table S3. Evolutionary Conservation of the Proposed HS Binding Site on NLs, Related to Figure 6**

| NL   | Species            | NCBI/Uniprot | Sequence Alignment                                                                                                                                                                                                                                                                  |
|------|--------------------|--------------|-------------------------------------------------------------------------------------------------------------------------------------------------------------------------------------------------------------------------------------------------------------------------------------|
| NL1  | Human              | Q8N2Q7       | QLYLHIGL <span style="background-color: red;">K</span> PRVKEHYRANKVNLWLELVPHLHNLNDISQYT                                                                                                                                                                                             |
| NL2  | Human              | Q8NFZ4       | KQYLHIGL <span style="background-color: red;">K</span> PRVVDNYRANKVAFWLELVPHLHNLHTELFYT                                                                                                                                                                                             |
| NL3  | Human              | Q9NZ94       | QLYLHIGL <span style="background-color: red;">K</span> PRVVDHYRATKVAFWKHLVPHLYNLHDMFHYT                                                                                                                                                                                             |
| NL4X | Human              | Q8N0W4       | QLYLHIGL <span style="background-color: red;">K</span> PRVVDHYRATKVAFWLELVPHLHNLNEIFQYV                                                                                                                                                                                             |
| NL4Y | Human              | Q8NFZ3       | QLYLHIGL <span style="background-color: red;">K</span> PRVVDHYRATKVAFWLELVPHLHNLNEIFQYV                                                                                                                                                                                             |
| NL1  | Macaca mulatta     | XP_011753510 | QLYLHIGL <span style="background-color: red;">K</span> PRVKEHYRANKVNLWLELVPHLHNLNDISQYT                                                                                                                                                                                             |
| NL2  | Macaca mulatta     | NP_001265378 | KQYLHIGL <span style="background-color: red;">K</span> PRVVDNYRANKVAFWLELVPHLHNLHTELFYT                                                                                                                                                                                             |
| NL3  | Macaca mulatta     | XP_014983140 | QLYLHIGL <span style="background-color: red;">K</span> PRVVDHYRATKVAFWKHLVPHLYNLHDMFHYT                                                                                                                                                                                             |
| NL4X | Macaca mulatta     | XP_014982385 | QLYLHIGL <span style="background-color: red;">K</span> PRVVDHYRATKVAFWLELVPHLHNLNEIFQYV                                                                                                                                                                                             |
| NL4Y | Macaca mulatta     | XP_014984076 | QLYLHIGL <span style="background-color: red;">K</span> PRVVDHYRATKVAFWLELVPHLHNLNEIFQYV                                                                                                                                                                                             |
| NL1  | Rattus norvegicus  | Q62765       | QLYLHIGL <span style="background-color: red;">K</span> PRVKEHYRANKVNLWLELVPHLHNLNDISQYT                                                                                                                                                                                             |
| NL2  | Rattus norvegicus  | Q62888       | KQYLHIGL <span style="background-color: red;">K</span> PRVVDNYRANKVAFWLELVPHLHNLHTELFYT                                                                                                                                                                                             |
| NL3  | Rattus norvegicus  | Q62889       | QLYLHIGL <span style="background-color: red;">K</span> PRVVDHYRATKVAFWKHLVPHLYNLHDMFHYT                                                                                                                                                                                             |
| NL1  | Mus musculus       | Q99K10       | QLYLHIGL <span style="background-color: red;">K</span> PRVKEHYRANKVNLWLELVPHLHNLNDISQYT                                                                                                                                                                                             |
| NL2  | Mus musculus       | Q69ZK9       | KQYLHIGL <span style="background-color: red;">K</span> PRVVDNYRANKVAFWLELVPHLHNLHTELFYT                                                                                                                                                                                             |
| NL3  | Mus musculus       | Q8BYM5       | QLYLHIGL <span style="background-color: red;">K</span> PRVVDHYRATKVAFWKHLVPHLYNLHDMFHYT                                                                                                                                                                                             |
| NL4  | Mus musculus       | B0F2B4       | QLYLHIGL <span style="background-color: red;">K</span> PRVVDHYRAAKVAFWLELVPHLHGLAADPGAY                                                                                                                                                                                             |
| NL1  | Bos Taurus         | NP_001192902 | QLYLHIGL <span style="background-color: red;">K</span> PRVKEHYRANKVNLWLELVPHLHNLNDISQYT                                                                                                                                                                                             |
| NL2  | Bos Taurus         | NP_001178171 | KQYLHIGL <span style="background-color: red;">K</span> PRVVDNYRANKVAFWLELVPHLHNLHTELFYT                                                                                                                                                                                             |
| NL3  | Bos Taurus         | AAI23786     | QLYLHIGL <span style="background-color: red;">K</span> PRVVDHYRATKVAFWKHLVPHLYNLHDMFHYT                                                                                                                                                                                             |
| NL1  | Gallus gallus      | NP_001192902 | QLYLHIGL <span style="background-color: red;">K</span> PRVKEHYRANKVNLWLELVPHLHNLNDISQYT                                                                                                                                                                                             |
| NL3  | Gallus gallus      | ADD52425     | QLYLHIGL <span style="background-color: red;">K</span> PRVVDHYRATKVAFWKHLVPHLYNLHDMFHYT                                                                                                                                                                                             |
| NL4  | Gallus gallus      | ADD52421     | QLYLHIGL <span style="background-color: red;">K</span> PRVVDHYRATKVAFWLELVPHLHNLNEIFQYV                                                                                                                                                                                             |
| NL1  | Xenopus tropicalis | ADB12662     | QLYLHIGL <span style="background-color: red;">K</span> PRVKEHYRATKVAFWLELVPRRLHVMNDLT---                                                                                                                                                                                            |
| NL2  | Xenopus tropicalis | XP_002944465 | KQYLHIGL <span style="background-color: red;">K</span> PRVVDNYRANKVAFWLELVPHLHNLHTELFYT                                                                                                                                                                                             |
| NL3  | Xenopus tropicalis | ADB12664     | QLYLHIGL <span style="background-color: red;">K</span> PRVVDHYRATKVAFWKHLVPHLYNLHDMFHYT                                                                                                                                                                                             |
| NL4  | Xenopus tropicalis | NP_001165299 | QLYLHIGL <span style="background-color: red;">K</span> PRVVDHYRATKVAFWLELVPHLHNLNEIFQYV                                                                                                                                                                                             |
| NL1  | Danio rerio        | NP_001135737 | QLYLHIGL <span style="background-color: red;">K</span> PRVKEHYRANKVNLWLELVPHLHSLNEVSQII                                                                                                                                                                                             |
| NL2  | Danio rerio        | XP_005172672 | KQYLHIGL <span style="background-color: red;">K</span> PRVVDNYRANKVAFWLELVPHLHTIHDEIPTY                                                                                                                                                                                             |
| NL3  | Danio rerio        | XP_005165239 | QLYLHIGL <span style="background-color: red;">K</span> PRVVDHYRATKVAFWKHLVPHLYNLHDMFHYT                                                                                                                                                                                             |
| NL4  | Danio rerio        | XP_021330915 | QLYLHIGL <span style="background-color: red;">K</span> PRVVDHYRATKVAFWLELVPHLHNLNEIFQYV                                                                                                                                                                                             |
| NL3  | Drosophila         | NP_001036685 | KKYLNFDTKPKLKNHYRAHRLSFWLNLIPLDHPGGDNVPA                                                                                                                                                                                                                                            |
| NL4  | Drosophila         | NP_001163661 | QKYLEIGMKPRIKNHFRAHQLSIWLRLIPELHRAGMEDVIA                                                                                                                                                                                                                                           |
| NL1  | C. elegans         | NP_510283    | EAYLEITDRPRVKNYRRAQVGFWNNFIPQLHKNGKETEPV                                                                                                                                                                                                                                            |
|      |                    |              | : **: : *::: * : : * : : * *:                                                                                                                                                                                                                                                       |
| NL2  | Drosophila         | NP_523496    | QLYVELGN <span style="background-color: red;">K</span> ANI <span style="background-color: cyan;">Q</span> SHYRGHKL <span style="background-color: cyan;">S</span> MWLNLI <span style="background-color: cyan;">P</span> QLHRHF <span style="background-color: cyan;">N</span> INDQS |
| NL1  | Drosophila         | NP_731172    | QAYLNIGIPPTVGYKYRQIYMNFWNKELPDELNQIAAIQEQ                                                                                                                                                                                                                                           |

The three Arg or Lys residues mutated here to disrupt HS binding (red highlight) are conserved in human, monkey, rat, mouse, bovine, chicken, frog, zebrafish, and worm NLs, as well as some isoforms of fly NLs. Fly NL2 may have a weaker HS-binding site composed of a Lys and a Gln whereas fly NL1 seems to lack a consensus HS binding site. Alignment was performed with Clustal.
